# Supplementary material for: Regulation of HK2 expression through alterations in CpG methylation of the HK2 promoter during progression of hepatocellular carcinoma
Source: PubMed Central journal article supplement (PMC5173097; doi:10.18632/oncotarget.9723), 2016-05-30
Supplement: oncotarget-07-41798-s001.pdf [file oncotarget-07-41798-s001.pdf]

## Regulation of *HK2* expression through alterations in CpG methylation of the *HK2* promoter during progression of hepatocellular carcinoma

### Supplementary Materials

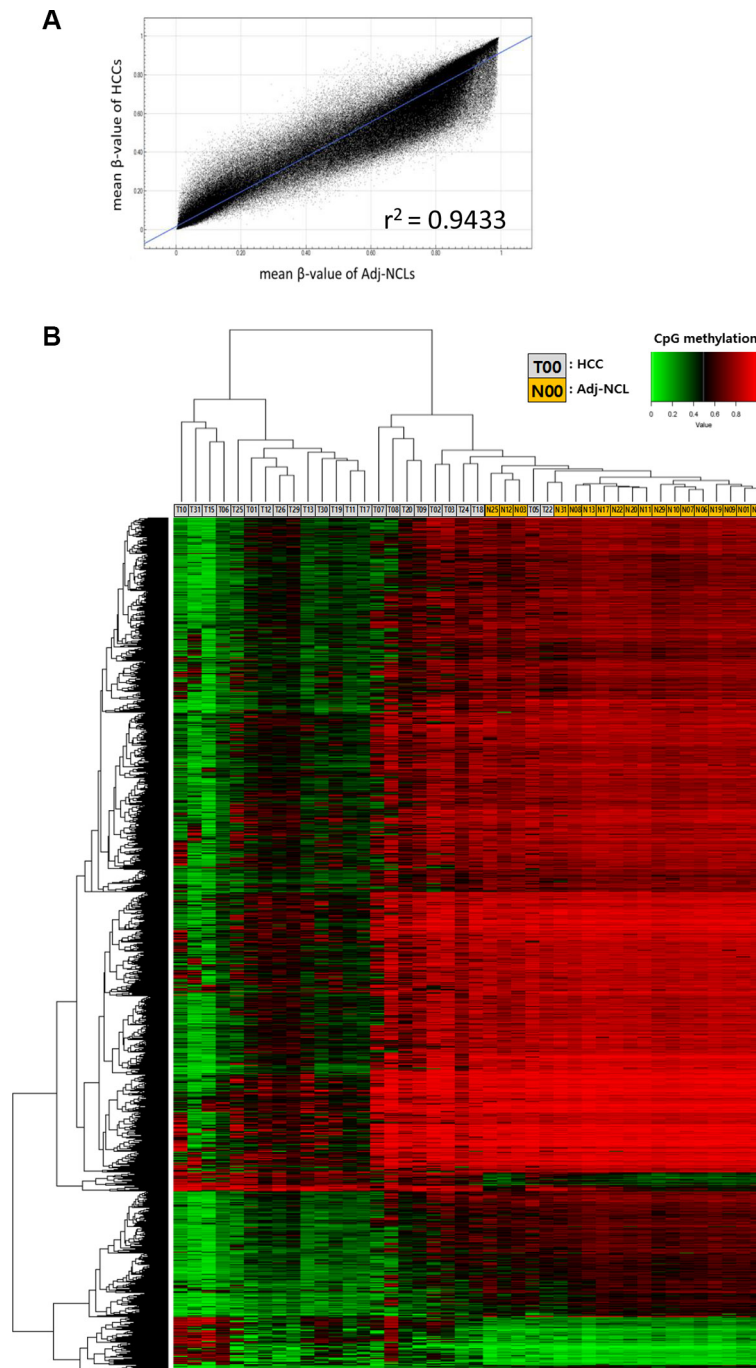

**Supplementary Figure S1: Global hypomethylation of CpG DNAs in the HCCs.** (A) The mean  $\beta$ -values of HCCs and Adj-NCLs were plotted. (B) Unsupervised hierarchical clustering of 24 HCCs and 18 Adj-NCLs, by samples and by CpGs showing delta mean  $\beta$ -values between HCC and its Adj-NCLs  $> \pm 0.2$  (total 25,330 CpG sites).

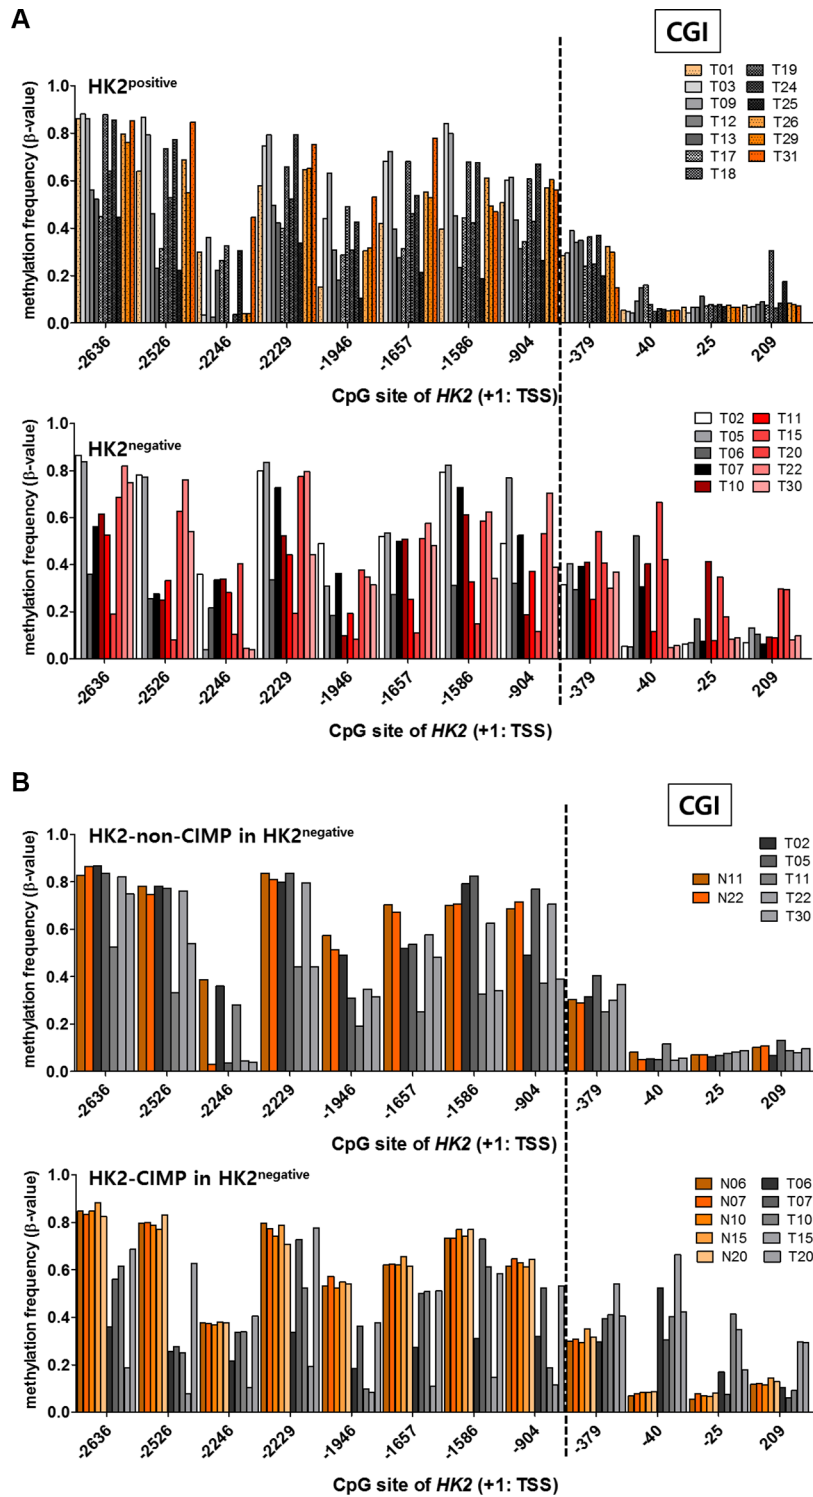

**Supplementary Figure S2: The methylation status of the *HK2* promoter according to *HK2* expression in HCCs.** The methylation status of the *HK2* promoter CpGs was plotted according to *HK2* expression: (A) *HK2*<sup>positive</sup> and *HK2*<sup>negative</sup>, (B) *HK2*-CIMP HCCs (T06-T20) and *HK2*-non-CIMP HCCs (T02-T30). Their Adj-NCL tissues were co-plotted, respectively.

**Supplementary Table S1: Primer sequences**

|                                         | Name of Primer     |   | sequences                             |
|-----------------------------------------|--------------------|---|---------------------------------------|
| <b>ChIP</b>                             | -1135F (CGI-shore) | F | 5'-AAGCCTCCTCACCCACCCCA-3'            |
|                                         | -963R (CGI-shore)  | R | 5'-GGCCCTATTCGCTTGCCCA-3'             |
|                                         | -302F (CGI)        | F | 5'-ACCCATAGCCGAGCCTGAC-3'             |
|                                         | -114R (CGI)        | R | 5'-GCAGCCAATCATCGCTCAC-3'             |
|                                         | +480F (control)    | F | 5'-TCACGGAGCTCAACCATGAC-3'            |
|                                         | +792R (control)    | R | 5'-GGAAAAGGGACTGGGGGAG-3'             |
| <b>Bisulfite Sequencing<sup>1</sup></b> | HK2-BS-F           | F | 5'-TTATAATAGGTAAGAATTAGGATGTTTTAG-3'  |
|                                         | HK2-BS-1st R       | R | 5'-TCATACAACAATATAACTTATTAATAAAACT-3' |
|                                         | HF2-BS-2nd R       | R | 5'-CCTAAAATAAAAACGTATAATCCGTA-3'      |

<sup>1</sup>Nested PCR was performed due to the low efficiency of PCR

**Supplementary Table S2: Primer sequences used to construct luciferase reporter vectors**

| Name of Primer |   | sequences                      |
|----------------|---|--------------------------------|
| -965F          | F | 5'-GCCTTAAAGTAGAGGGACAAGGG-3'  |
| -407F          | F | 5'-GATCCCGAGATGCCAGACAG-3'     |
| -337F          | F | 5'-GCCCCACACC CCGGGTCC-3'      |
| -305F          | F | 5'-CCCACCCATAGCCGAGCCTGAC-3'   |
| -268F          | F | 5'-TG CGCCTTCCGTCCAGCC-3'      |
| -255F          | F | 5'-CCAGCCTT TAGCCACGGACCACA-3' |
| -175F          | F | 5'-AGGCTGCC GGCTCCGGTGTCTG-3'  |
| +106R          | R | 5'-CTCTCCGATTCACAGGCGCGTGG-3'  |

**Supplementary Table S3: siRNA sequences**

| Target       | No. of siRNA | sequences                        |
|--------------|--------------|----------------------------------|
| <i>HIF1A</i> | 1            | 5'-GGAAGAACUAUGAACAUAAAAGUCTG-3' |
|              | 2            | 5'-ACAAUACCCUAUGUAGUUGUGGAAG-3'  |
|              | 3            | 5'-CCAGCAGACUCAAUACAAGAACCT-3'   |
